# Supplementary material
Source: PubMed Central journal article supplement (PMC9890236)
Supplement: EMBJ-42-e111364-s009.pdf [file EMBJ-42-e111364-s009.pdf]

# Appendix Table S1

## Plasmid constructs

### Constructs for phase separation assay

| Name          | Vector  | Forward primer (5'-3')                            | Reverse primer (5'-3')                           | Restriction sites |
|---------------|---------|---------------------------------------------------|--------------------------------------------------|-------------------|
| His-RFP       | pET28a  | GGACAGCAAATGGGTCGCG<br>GATCCatggcctcctccgaggacgt  | GTGGTGGTCTCGAGTGCGGC<br>CGCAggcggctggagtgccggc   | BamHI/NotI        |
| His-zParn-RFP | His-RFP | CAGCAAATGGGTCGCGGATC<br>Catggaggtcacgagacagaattta | TCCTCGGAGGAGGCCATGGAc<br>caaacctgaggacgtcaaagagc | BamHI             |

### Constructs for co-IP

| Name           | Vector   | Forward primer (5'-3')                              | Reverse primer (5'-3')                            | Restriction sites |
|----------------|----------|-----------------------------------------------------|---------------------------------------------------|-------------------|
| pCS2-RFP       | pCS2     | CTTGTTCTTTTTGCAGGATCC<br>atggcctcctccgaggacgt       | CTATAGTCTTAGAGGCTCGAGt<br>caggagagcacacacttgca    | BamHI/XhoI        |
| Luciferase-RFP | pCS2-RFP | ACTTGTCTTTTTGCAGGATC<br>Catggaagacgccaataacataa     | TCCTCGGAGGAGGCCATGGAc<br>acggcgatcttccgcccttc     | BamHI             |
| zCnot1-RFP     | pCS2-RFP | ACTTGTCTTTTTGCAGGATC<br>Catgaatctgactcgctcgcctgg    | TCCTCGGAGGAGGCCATGGAA<br>ctggcaccggttccctccatcacc | BamHI             |
| zCnot1-N-RFP   | pCS2-RFP | ACTTGTCTTTTTGCAGGATC<br>Catgaatctgactcgctcgcctgg    | TCCTCGGAGGAGGCCATGGAtg<br>taggtctgtgatggttggtt    | BamHI             |
| zCnot1-M-RFP   | pCS2-RFP | ACTTGTCTTTTTGCAGGATC<br>Cgctgtggaccaagaagatgtgc     | TCCTCGGAGGAGGCCATGGAct<br>ccgatgctgagaaatccagag   | BamHI             |
| zCnot1-C-RFP   | pCS2-RFP | ACTTGTCTTTTTGCAGGATC<br>Ctactgatgccaccaggccttagag   | TCCTCGGAGGAGGCCATGGAA<br>ctggcaccggttccctccatcacc | BamHI             |
| zCnot6a-RFP    | pCS2-RFP | ACTTGTCTTTTTGCAGGATC<br>Catgccaaggaaaaatgatccgc     | TCCTCGGAGGAGGCCATGGAc<br>ctgcggccaggcagatggatgccg | BamHI             |
| zPan2-RFP      | pCS2-RFP | ACTTGTCTTTTTGCAGGATC<br>Catgatgaactcgagggctggacc    | TCCTCGGAGGAGGCCATGGAta<br>aaccatcactgagggaaatagc  | BamHI             |
| zPan3-RFP      | pCS2-RFP | ACTTGTCTTTTTGCAGGATC<br>Catgaacagtggtgactccccgctcag | TCCTCGGAGGAGGCCATGGAc<br>agggggcggttcgccgtggccagc | BamHI             |
| zParn-RFP      | pCS2-RFP | ACTTGTCTTTTTGCAGGATC<br>Catggaggtcacgagacagaattta   | TCCTCGGAGGAGGCCATGGAc<br>caaacctgaggacgtcaaagagc  | BamHI             |
| zDcp1a-RFP     | pCS2-RFP | ACTTGTCTTTTTGCAGGATC<br>Catggagtggtgataaaagcgggtc   | TCCTCGGAGGAGGCCATGGAta<br>acttgacattgttgaggcctta  | BamHI             |
| zDcp2-RFP      | pCS2-RFP | ACTTGTCTTTTTGCAGGATC<br>Catggagacaaaaagaggggagattc  | TCCTCGGAGGAGGCCATGGAg<br>gactcgaagcaggatttcagatg  | BamHI             |

### Constructs for zebrafish microinjection

| Name          | Vector | Forward primer (5'-3')                                   | Reverse primer (5'-3')                                  | Restriction sites | Linearization site/<br>RNA polymerase |
|---------------|--------|----------------------------------------------------------|---------------------------------------------------------|-------------------|---------------------------------------|
| 14b-200nt-GFP | pCS2   | N200-F:<br>GGATCCCATCGATTCAATTC<br>cggaagtggaccgaccttttg | N200-R:<br>TCCTCGCCCTTGCTCACCAtag<br>cgccctcccctgcaggt  | EcoRI/XhoI        | NotI/SP6                              |
|               |        | GFP-F:<br>ATGGTGAGCAAGGGCGAGGA<br>GC                     | GFP-R:<br>CTATAGTCTTAGAGGCTCGAGT<br>TACTTGTACAGCTCGTCCA |                   |                                       |

## Constructs for *in situ* probes

| Name            | Vector | Forward primer (5'-3')                        | Reverse primer (5'-3')                        | Restriction sites | Linearization site/<br>RNA polymerase |
|-----------------|--------|-----------------------------------------------|-----------------------------------------------|-------------------|---------------------------------------|
| <i>org</i>      | pcDNA3 | GCTTGGTACCGAGCTCGctgg<br>gcctcagaggaacta      | GTGATGGATATCTGCAGatgactg<br>accagtgaacta      | BamHI/EcoRI       | XhoI/T7                               |
| <i>trip10a</i>  | pcDNA3 | GCTTGGTACCGAGCTCGgttaa<br>gtgtgattgtggcgt     | GTGATGGATATCTGCAGggcttca<br>ctcatcttctcc      | BamHI/EcoRI       | XhoI/T7                               |
| <i>dnajc5ga</i> | pcDNA3 | GCTTGGTACCGAGCTCGtttctg<br>gggtgtgtacacgg     | GTGATGGATATCTGCAGatcatgg<br>cagacgccaagcc     | BamHI/EcoRI       | XhoI/T7                               |
| <i>ccnb1</i>    | pcDNA3 | CTTGGTACCGAGCTCGGATC<br>Ctgagatctgcttagccaggt | TGATGGATATCTGCAGAATTCat<br>gatggctctccgtgtcac | BamHI/EcoRI       | XhoI/T7                               |

## Antibodies and drugs

### Primary antibodies

| Name              | Antigen               | Host organism | Source                         | Dilution              | IB/IF |
|-------------------|-----------------------|---------------|--------------------------------|-----------------------|-------|
| mRbm14            | Human RBM14           | Rabbit, poly  | Sigma, R04295                  | 1:3,000(IB)/1:100(IF) | IB/IF |
| zRbm14a           | Zebrafish rbm14a      | Rabbit, poly  | Raised in lab                  | 1:1,000(IB)/1:100(IF) | IB/IF |
| $\alpha$ -Tubulin | Chick microtubules    | Mouse, mono   | Sigma, T9026                   | 1:5,000               | IB    |
| $\gamma$ -Tubulin | Gamma-Tubulin         | Mouse, mono   | Life Technologies,<br>MA119421 | 1:100                 | IF    |
| GFP               | GFP                   | Rabbit, poly  | Life Technologies, A-6455      | 1:5,000               | IB    |
| RFP               | RFP                   | Rat, mono     | Chromotek, 5F8                 | 1:3,000               | IB    |
| m <sup>6</sup> A  | N6-methyladenosine    | Rabbit, mono  | Cell Signaling, #56593         | 1:500(IB)/1:200(IF)   | IB/IF |
| PARN              | Human PARN (1-347 aa) | Rabbit, poly  | Proteintech, 13799-1-AP        | 1:2,000               | IB    |
| zParn             | Zebrafish Parn        | Rabbit, poly  | Raised in lab                  | 1:200                 | IF/IB |
| DIG-POD           | Digoxigenin           | Sheep, poly   | Roche, 11207733910             | 1:1,000               | IF    |
| Gata6             | Human GATA6           | Goat, poly    | R&D, AF1700                    | 1:100                 | IF    |
| Nanog             | Mouse Nanog           | Mouse, mono   | SANTA CRUZ, sc-376915          | 1:100                 | IF    |
| Oct4              | Mouse Oct3/4          | Mouse, mono   | BD, 611202                     | 1:100                 | IF    |

### Secondary antibodies

| Name                                      | Host organism | Source                                     | Dilution | IB/IF |
|-------------------------------------------|---------------|--------------------------------------------|----------|-------|
| Anti-mouse IgG (H+L)-<br>HRP              | Goat          | Life Technologies, G-<br>21040             | 1:5,000  | IB    |
| Anti-rabbit IgG (H+L)-<br>HRP             | Goat          | Life Technologies, G-<br>21234             | 1:5,000  | IB    |
| Anti-rat IgG (H+L)-HRP                    | Goat          | Abclonal, AS028                            | 1:3,000  | IB    |
| Anti-mouse IgG (H+L)-<br>Cy3              | Donkey        | Jackson<br>ImmunoResearch, 715-<br>165-151 | 1:1,000  | IF    |
| Anti-mouse IgG (H+L)-<br>Alexa Fluor 647  | Donkey        | Life Technologies, A-<br>31571             | 1:1,000  | IF    |
| Anti-rabbit IgG (H+L)-<br>Alexa Fluor 488 | Donkey        | Life Technologies, A-<br>21206             | 1:1,000  | IF    |
| Anti-goat IgG (H+L)-<br>Alexa Fluor 546   | Donkey        | Life Technologies, A-<br>11056             | 1:1,000  | IF    |

## Drugs

| Name                   | Source                            | Working Concentration |
|------------------------|-----------------------------------|-----------------------|
| 5-Ethynyl Uridine (EU) | Click Chemistry Tools, #1261      | 40 pmol per embryo    |
| 1,6-Hexanediol         | Sangon Biotech Co., Ltd., A601513 | 0%-1.25% (w/v)        |
| Hoechst 33342          | Life Technologies, H3570          | 2 µg/mL               |
| Pyronin Y              | MedChem Express, HY-D0971         | 4 µg/mL               |
| RNase A                | Life Technologies, 12091021       | 100 µg/ml             |
| Proteinase K           | Sigma, P6556                      | 5 µg/ml               |

## Oligos

### Morpholino oligos

| Name    | Targeted gene           | Sequence(5'-3')           |
|---------|-------------------------|---------------------------|
| ctrl-MO | - (negative control)    | CCTCTTACCTCAGTTACAATTATA  |
| 14a-MO  | Zebrafish <i>rbm14a</i> | GCTTCACTGCGCTGCTGTCGTCAT  |
| 14b-MO  | Zebrafish <i>rbm14b</i> | TTTTATTCCAGTTGACTCACCTGGC |
| 14b-tMO | Zebrafish <i>rbm14b</i> | GTTTCAAATGGTGGTCCACTTCC   |

### RNA oligos

| Oligo name         | Gene        | Sequence (5'-3')                                                                                                                                                                                                            | Length (nt) | Inter-modification |
|--------------------|-------------|-----------------------------------------------------------------------------------------------------------------------------------------------------------------------------------------------------------------------------|-------------|--------------------|
| 0m <sup>5</sup> C  | <i>cap1</i> | aUggUgagcaagggcUCCUGUCGUGUGAAAUCGUCAGCGCCA<br>AGAGCUCCGAGAUGAA                                                                                                                                                              | 59          | -                  |
| 1m <sup>5</sup> C  | <i>cap1</i> | aUggUgagcaagggcUCCUGUCGUGUGAAAUCGUCAGCGCCA<br>AGAGCUm <sup>5</sup> CCGAGAUGAA                                                                                                                                               | 59          | m <sup>5</sup> C   |
| 0m <sup>6</sup> A  | -           | GGACUCGGACUUGGACUCUGGACUUUGGACUUGGACUUGG<br>ACUUCGGACUCGGACUUUGGACU                                                                                                                                                         | 63          | -                  |
| 1m <sup>6</sup> A  | -           | GGUCUCGGUCUUGGUCUCUGGUCUUUGGm <sup>6</sup> ACUUGGUCU<br>UGGUCUUCGGUCUCGGUCUUUGGUCU                                                                                                                                          | 63          | m <sup>6</sup> A   |
| 10m <sup>6</sup> A | -           | GGm <sup>6</sup> ACUCGGm <sup>6</sup> ACUUGGm <sup>6</sup> ACUCUGGm <sup>6</sup> ACUUUGm <sup>6</sup><br>ACUUGGm <sup>6</sup> ACUUGGm <sup>6</sup> ACUUCGGm <sup>6</sup> ACUCGGm <sup>6</sup> ACUUUG<br>Gm <sup>6</sup> ACU | 63          | m <sup>6</sup> A   |

### Primers for mouse genotyping

| Name | Sequence(5'-3')      |
|------|----------------------|
| F1   | GTGGGCTCTATGGCTTCTGA |
| F2   | GCCATTGGGATTTAGGTGGG |
| R1   | TCTGCTGAAGCTCCCTTCCA |

### Primers for poly(A) tail length assay

| Gene            | Forward primer (5'-3')  | Reverse primer (5'-3') |
|-----------------|-------------------------|------------------------|
| <i>org</i>      | TGAGAGTGATTTGGAAGTCG    | AGACAAACATTCTGAAACCG   |
| <i>trip10a</i>  | CGTTTGCTATTTCGATAGGT    | AACTTACCCAGACATTCAACAG |
| <i>dnajc5ga</i> | ATCTGCTTCCAAACCAACTC    | GTAGCGATGTAGTGTGTCATGG |
| <i>actb1</i>    | TTGTTATAGTGTATGTAATTATG | GCTTCCCTCATTGCAACA     |
